# Supplementary material
Source: PubMed Central journal article supplement (PMC2711425)
Supplement: mmc1.pdf [file mmc1.pdf]

Biophysical Journal, Volume 96

**Supporting Material**

**Regulation of glycolytic oscillations by mitochondrial and plasma membrane H<sup>+</sup>-ATPases**

Lars Folke Olsen, Ann Zahle Andersen, Anita Lunding, Jens Christian Brasen and Allan K. Poulsen

Supplementary material to the paper

Regulation of glycolytic oscillations by  
mitochondrial and plasma membrane H<sup>+</sup>-  
ATPases

*Lars Folke Olsen<sup>1\*</sup>, Ann Zahle Andersen<sup>2</sup>, Anita Lunding<sup>1</sup>, Jens Christian Brasen<sup>1</sup>*

*and Allan K. Poulsen<sup>1,3</sup>*

<sup>1</sup> CelCom and <sup>2</sup>Microbiology Group, Department of Biochemistry and Molecular Biology, University of Southern Denmark, Campusvej 55, DK-5230 Odense M, Denmark, <sup>3</sup>Danish Technological Institute, Teknologiparken, Kongsvang Alle 29, DK-8000 Århus C, Denmark \*correspondence: lfo@bmb.sdu.dk

**Table S1** Effect of various inhibitors of glycolysis, respiration and H<sup>+</sup>-ATPases on oscillations of NADH and mitochondrial membrane potential. (–) indicates inhibition; (+) indicates stimulation; (0) indicates no effect.

| Inhibitor      | Effect                                                                                                                      | Concentration added | Effect on NADH oscillations | Effect on $\Delta\psi$ oscillations |
|----------------|-----------------------------------------------------------------------------------------------------------------------------|---------------------|-----------------------------|-------------------------------------|
| 2-deoxyglucose | Inhibits hexokinase                                                                                                         | 5 mM                | –                           | –                                   |
| Iodoacetate    | Inhibits glyceraldehyde-3-phosphate dehydrogenase                                                                           | 20 mM               | –                           | –                                   |
| Antimycin A    | Inhibits complex III                                                                                                        | 2 $\mu$ M           | 0                           | 0                                   |
| Azide          | Inhibits complex IV<br>Inhibits alternative respiration in S.l Cerevisiae<br>Inhibits F <sub>0</sub> F <sub>1</sub> -ATPase | 50 $\mu$ M - 5 mM   | –                           | –                                   |
| SHAM           | Inhibits alternative oxidases                                                                                               | 4 mM                | 0                           | 0                                   |
| FCCP           | Dissipates H <sup>+</sup> electrochemical gradients                                                                         | 50 nM-5 $\mu$ M     | 0                           | –                                   |
| Amphotericin B | Induces leakage of K <sup>+</sup> from cells                                                                                | 10-20 $\mu$ M       | –                           | –                                   |
| Omeprazole     | Inhibits plasma membrane H <sup>+</sup> -ATPase                                                                             | 50-250 $\mu$ M      | 0/?                         | +/-                                 |

Figure S1

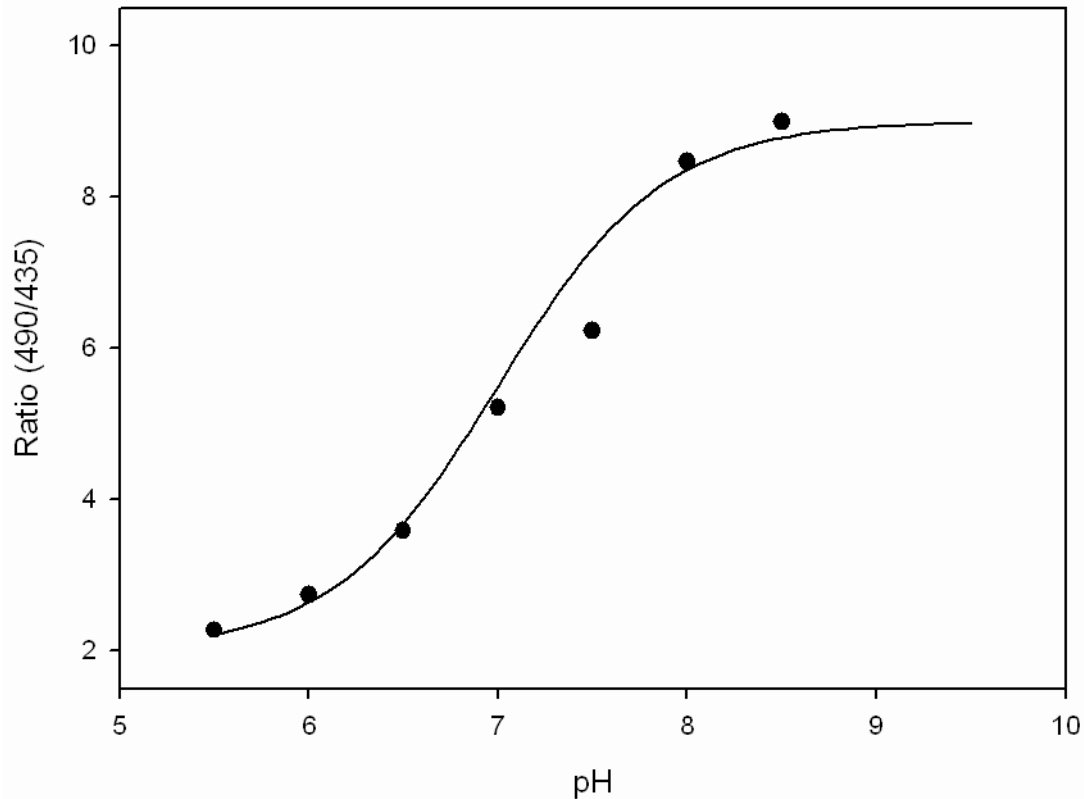

Figure S1. Calibration curve of fluorescence excitation ratio (490 nm/435 nm) vs. pH of permeabilized cells of *Saccharomyces cerevisiae* in citrate/phosphate buffer at different pH values. Permeabilization was done by suspending the cells in 70% (v/v) ethanol/phosphate buffer at 30 °C for 30 minutes. Then the cells were centrifuged at 7,000×g for 3 minutes and the pellet was resuspended in phosphate/citrate buffer at the desired pH. The permeabilized cells were stained with 5- (and 6-) carboxyfluorescein diacetate succinimidyl ester at 40 °C for 20 min, centrifuged again, resuspended in the same phosphate/citrate buffer, and the excitation ratio (490 nm/435 nm, emission 520 nm) was recorded. Temperature 25 °C

Figure S2

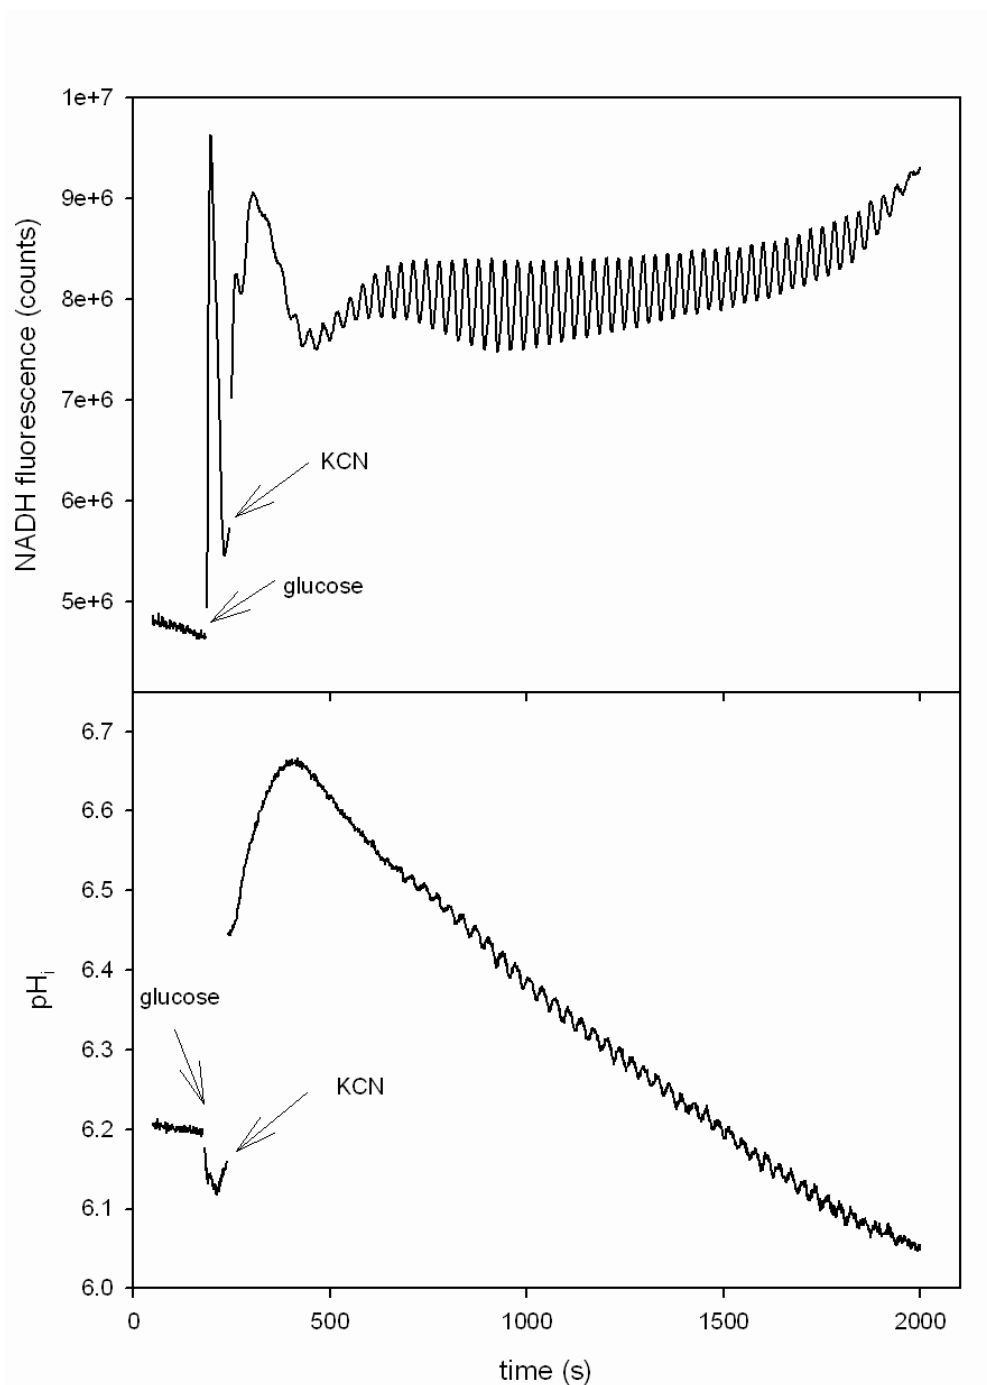

**Figure S2** Time series of NADH fluorescence and intracellular pH in yeast cells stained with 5- (and 6-) carboxyfluorescein diacetate succinimidyl ester and suspended to a cell density of 10% wet weight in 100 mM phosphate buffer at pH 5.5. At time  $t=180$  s 30 mM glucose was added to the suspension followed by 5 mM KCN at 240 s;  $pH_i$  was determined as explained in the “Materials and Methods” section. The final external pH was 5.15 at 2000 s. Temperature 25 °C

Figure S3

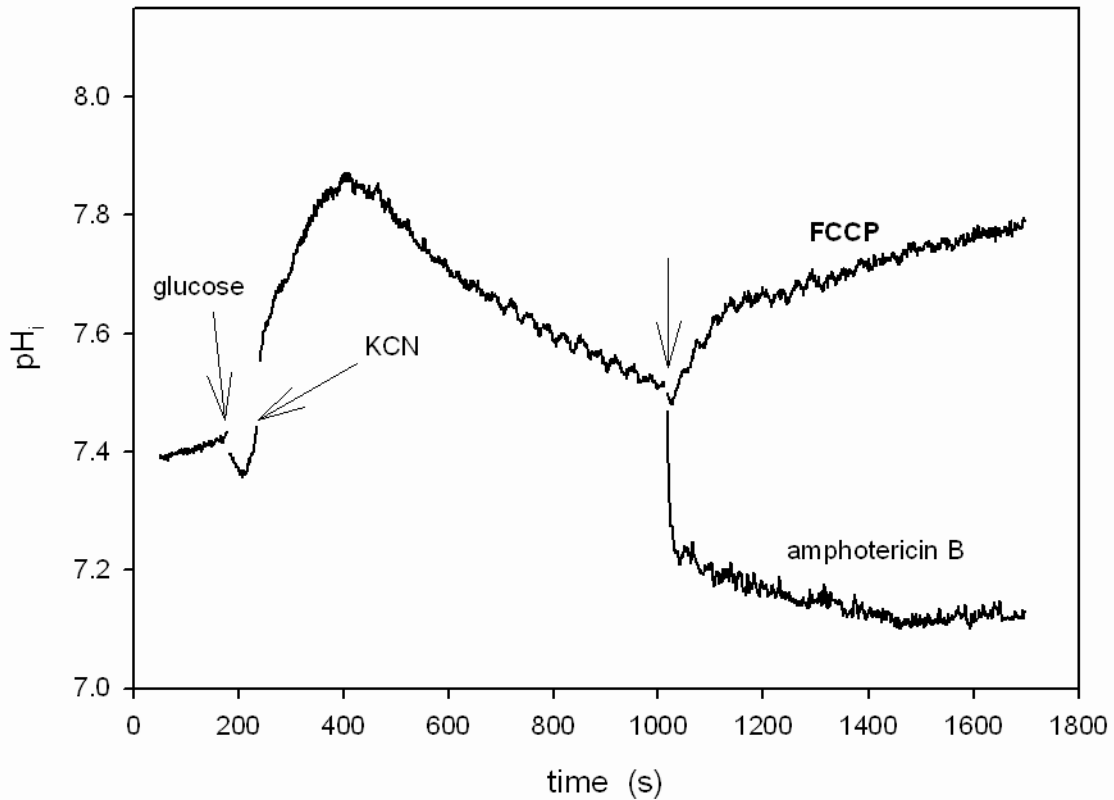

**Figure S3.** Effect of the addition of FCCP or amphotericin B on  $pH_i$ . Yeast cells stained with 5- (and 6-) carboxyfluorescein diacetate succinimidyl ester were suspended to a cell density of 10% wet weight in 100 mM phosphate buffer, pH 6.8. At time  $t=180$  s 30 mM glucose was added to the suspension followed by 5 mM KCN at 240 s. At time approximately 1000 s 20  $\mu$ M FCCP or 20  $\mu$ M amphotericin B were added to the suspension;  $pH_i$  was determined as explained in the “Materials and Methods” section. Temperature 25  $^{\circ}$ C

Figure S4

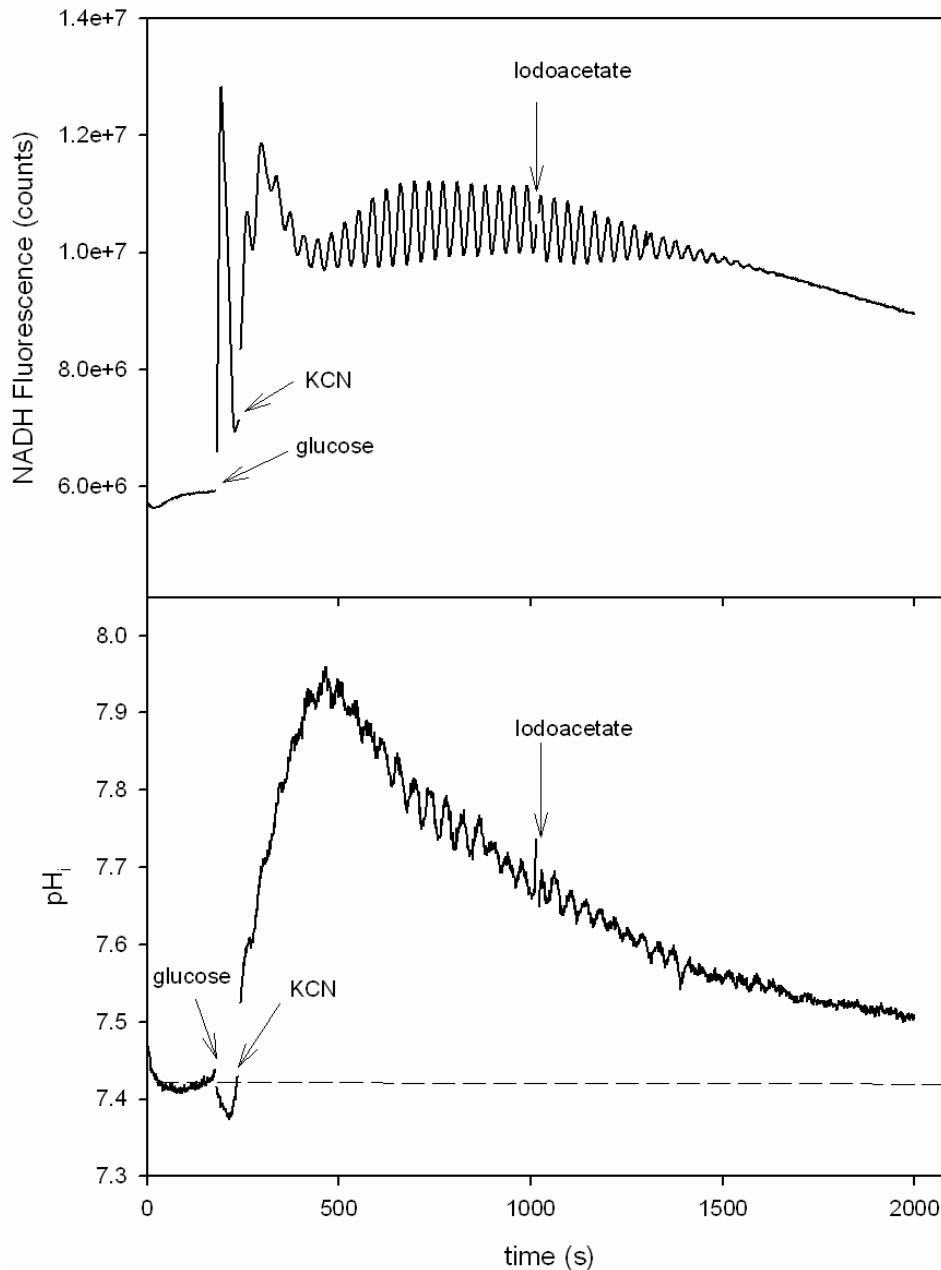

**Figure S4.** Effect of the addition of iodoacetate on  $pH_i$ . Yeast cells stained with 5- (and 6-)- carboxyfluorescein diacetate succinimidyl ester were suspended to a cell density of 10% wet weight in 100 mM phosphate buffer, pH 6.8. At time  $t=180$  s 30 mM glucose was added to the suspension followed by 5 mM KCN at 240 s. At time approximately 1000 s 20 mM iodoacetate was added to the suspension;  $pH_i$  was determined as explained in the “Materials and Methods” section. Temperature 25 °C

Figure S5

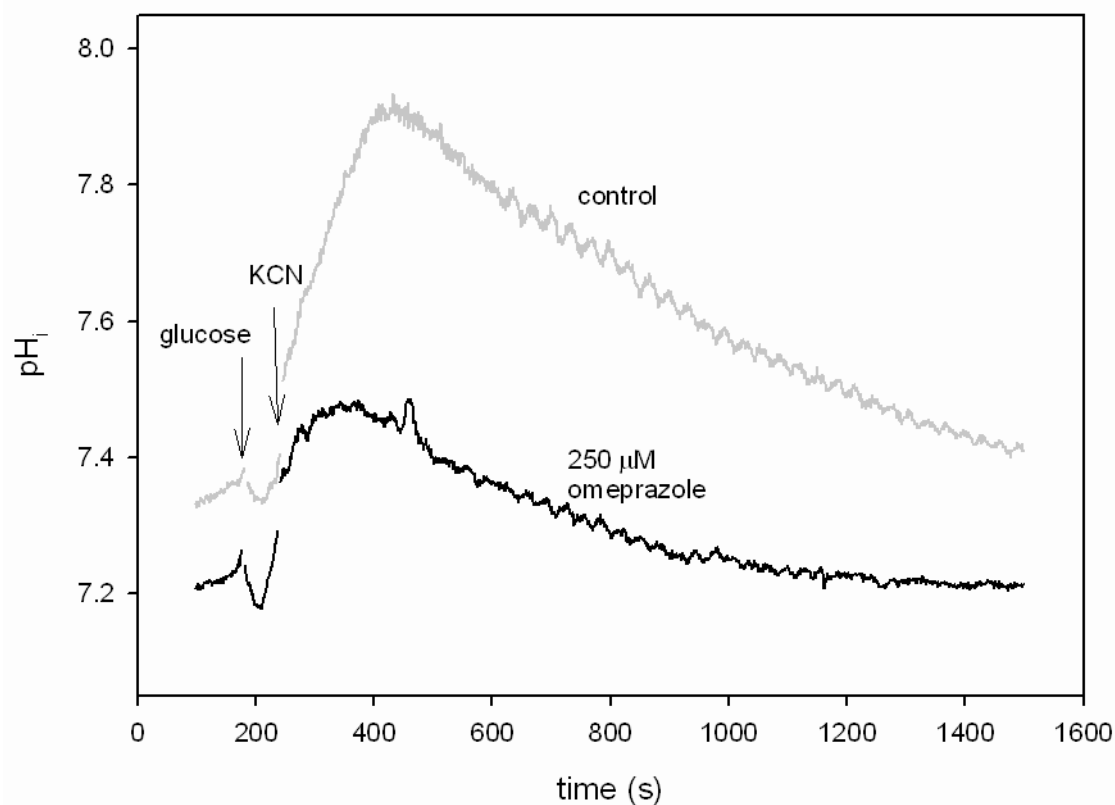

**Figure S5.** The effect of omeprazole on  $pH_i$ . Yeast cells (10% wet weight) suspended in 250 mM sorbitol were treated for 10 min with omeprazole as described in the “Materials and Methods” section. After centrifugation the cells were stained with 5- (and 6)-carboxyfluorescein diacetate succinimidyl ester and suspended (10% wet weight) in 100 mM phosphate buffer, pH 6.8. The graphs show plots of the intracellular pH against time in the untreated (control) cells and cells treated with 250  $\mu$ M omeprazole following addition of first 30 mM glucose and then 5 mM KCN as indicated. Temperature 25  $^{\circ}$ C
